# Supplementary material for: Branched polyethylenimine-functionalized carbon dots as sensitive and selective fluorescent probes for N-acetylcysteine via an off–on mechanism
Source: Royal Society of Chemistry journal article supplement (doi:10.1039/c7an01136a), 2017-01-01
Supplement: c7an01136a1.pdf [file c7an01136a1.pdf]

## Electronic Supplementary Information (ESI)

### **Branched polyethylenimine-functionalized carbon dots as sensitive and selective fluorescent probes for N-acetylcysteine via off-on mechanism**

Hui Liu,<sup>a</sup> Rong Sheng Li,<sup>a</sup> Jun Zhou,<sup>\*ab</sup> and Cheng Zhi Huang <sup>\* a c</sup>

<sup>a</sup> Key Laboratory of Luminescent and Real-Time Analytical Chemistry (Southwest University), Ministry of Education, College of Pharmaceutical Sciences, Southwest University, Chongqing 400716, China.

<sup>b</sup> College of Computer and Information Science, Southwest University, Chongqing 400715, China.

<sup>c</sup> Chongqing Key Laboratory of Biomedical Analysis (Southwest University), Chongqing Science Technology Commission, College of Chemistry and Chemical Engineering, Southwest University, Chongqing 400715, China.

\* Corresponding author. E-mail: zhouj@swu.edu.cn, chengzhi@swu.edu.cn, Tel: (+86) 23 68254659, Fax: (+86) 23 68367257.

## Additional figures

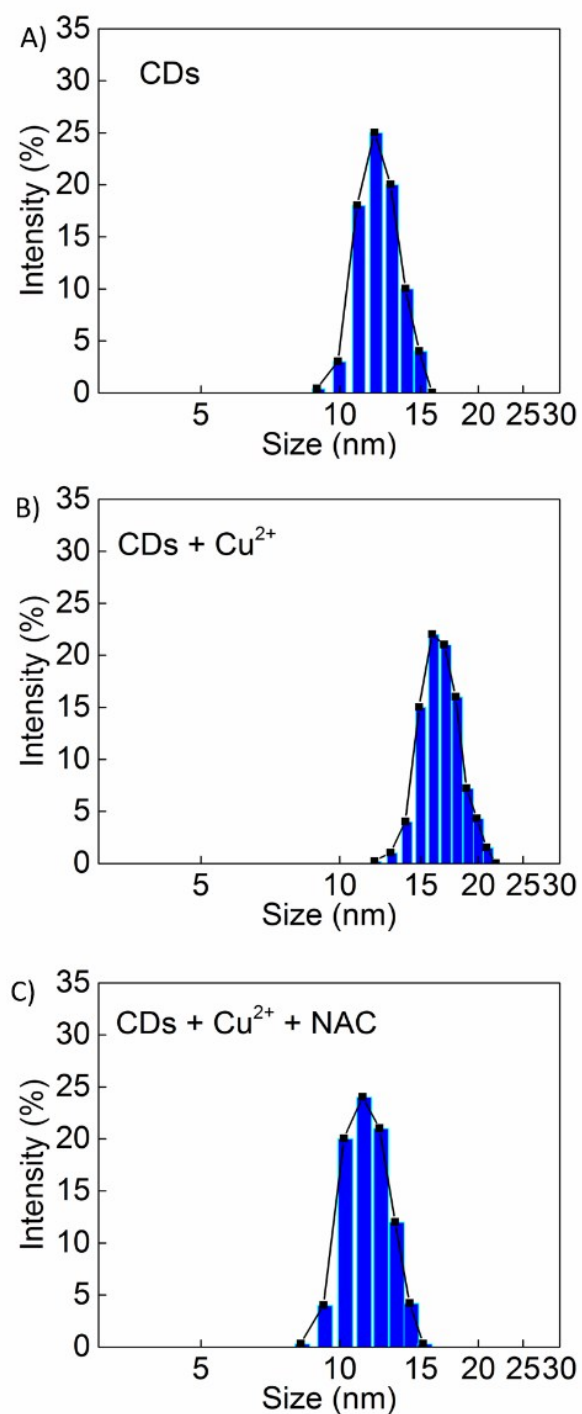

**Fig. S1** Hydrodynamic size. A) Hydrodynamic size of PEI-CDs. B) Hydrodynamic size of PEI-CDs/Cu<sup>2+</sup> complexes when the Cu<sup>2+</sup> were added into PEI-CDs solution. C) Hydrodynamic size of PEI-CDs when the NAC was added into PEI-CDs/Cu<sup>2+</sup> solution.

**Table S1** The fluorescence lifetime of PEI-CDs before and after adding Cu<sup>2+</sup> and NAC.

| Sample                        | $\tau_1$ /ns (%) | $\tau_2$ /ns (%) | $\tau_3$ /ns (%) | $\tau$ /ns |
|-------------------------------|------------------|------------------|------------------|------------|
| PEI-CDs                       | 6.19 (30.18)     | 13.8 (65.49)     | 1.29 (4.32)      | 10.99      |
| PEI-CDs+Cu <sup>2+</sup>      | 4.55 (32.81)     | 12.9 (58.94)     | 0.86 (8.25)      | 9.17       |
| PEI-CDs+Cu <sup>2+</sup> +NAC | 5.30 (33.39)     | 13.3 (57.08)     | 1.08 (9.53)      | 9.46       |

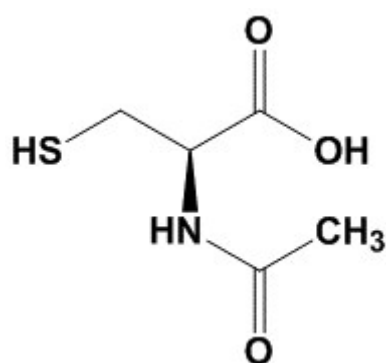

**Fig. S2** Schematic diagram of NAC structure.

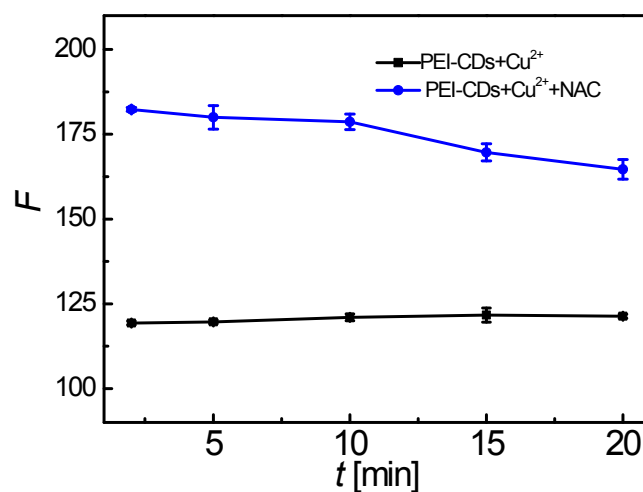

**Fig. S3** Time effect optimization of experimental conditions. The fluorescence intensity change with time of PEI-CDs/Cu<sup>2+</sup> solution and fluorescence recovery intensity change by addition of NAC.
